# Supplementary material for: Changes in the Microbial Composition of the Rhizosphere of Hop Plants Affected by Verticillium Wilt Caused by Verticillium nonalfalfae
Source: MDPI journal article supplement (doi:10.3390/microorganisms11071819), 2023-07-16
Supplement: s1 [file s1]

**Supplementary Material. Table S10.-** Bacterial OTUs with significant differential abundances between diseased bulk (DB) and diseased rhizosphere (DR) soils. OTUs with a positive LFC are highlighted on a yellow background while OTUs with a negative LFC are highlighted on a blue background. LFC: log2-fold changes; SE: standard error; *p*-values were adjusted with the False Discovery Rate (FDR) method; unclas.: unclassif.

| OTU      | LFC    | LFC (SE) | Wald statistic | <i>p</i> -value | FDR      | Phylum   | Kingdom          | Class                   | Order                      | Family                     | Genus                      |
|----------|--------|----------|----------------|-----------------|----------|----------|------------------|-------------------------|----------------------------|----------------------------|----------------------------|
| Otu01095 | 4,624  | 1,013    | 4,566          | 4,97E-06        | 4,48E-03 | Bacteria | Bacteroidota     | Bacteroidia             | Cytophagales               | Cytophagales_unclas.       | Cytophagales_unclas.       |
| Otu00508 | 3,053  | 0,804    | 3,798          | 1,46E-04        | 4,69E-02 | Bacteria | Acidobacteriota  | Holophagae              | Subgroup_7                 | Subgroup_7_fa              | Subgroup_7_ge              |
| Otu00889 | 2,828  | 0,743    | 3,807          | 1,40E-04        | 4,62E-02 | Bacteria | Cyanobacteria    | Vampirivibrionia        | Vampirovibrionales         | Vampirovibrionaceae        | Vampirovibrionaceae_ge     |
| Otu00571 | 2,823  | 0,615    | 4,587          | 4,49E-06        | 4,33E-03 | Bacteria | Fibrobacterota   | Fibrobacteria           | Fibrobacterales            | Fibrobacterales_fa         | BBMC-4                     |
| Otu00811 | 2,732  | 0,641    | 4,261          | 2,04E-05        | 1,39E-02 | Bacteria | Bacteroidota     | Bacteroidia             | Sphingobacteriales         | env,OPS_17                 | env,OPS_17_ge              |
| Otu00691 | 2,692  | 0,638    | 4,220          | 2,45E-05        | 1,60E-02 | Bacteria | Bacteroidota     | Bacteroidia             | Sphingobacteriales         | env,OPS_17                 | env,OPS_17_ge              |
| Otu00224 | 2,366  | 0,367    | 6,447          | 1,14E-10        | 1,87E-06 | Bacteria | Bacteria_unclas. | Bacteria_unclas.        | Bacteria_unclas.           | Bacteria_unclas.           | Bacteria_unclas.           |
| Otu00655 | 2,348  | 0,576    | 4,076          | 4,58E-05        | 2,21E-02 | Bacteria | Patescibacteria  | Saccharimonadia         | Saccharimonadales          | Saccharimonadales_fa       | Saccharimonadales_ge       |
| Otu00314 | 2,317  | 0,424    | 5,468          | 4,56E-08        | 1,93E-04 | Bacteria | Bacteroidota     | Kapabacteria            | Kapabacteriales            | Kapabacteriales_fa         | Kapabacteriales_ge         |
| Otu00326 | 2,290  | 0,489    | 4,683          | 2,82E-06        | 3,09E-03 | Bacteria | Cyanobacteria    | Vampirivibrionia        | Vampirovibrionales         | Vampirovibrionaceae        | Vampirovibrionaceae_ge     |
| Otu00246 | 2,167  | 0,445    | 4,875          | 1,09E-06        | 1,62E-03 | Bacteria | Acidobacteriota  | Holophagae              | Subgroup_7                 | Subgroup_7_fa              | Subgroup_7_ge              |
| Otu00419 | 2,000  | 0,519    | 3,857          | 1,15E-04        | 4,00E-02 | Bacteria | Proteobacteria   | Gammaproteobacteria     | Pseudomonadales            | Pseudohongiellaceae        | Blyi10                     |
| Otu00396 | 1,957  | 0,479    | 4,082          | 4,46E-05        | 2,21E-02 | Bacteria | Bdellovibrionota | Oligoflexia             | 0319-6G20                  | 0319-6G20_fa               | 0319-6G20_ge               |
| Otu00290 | 1,954  | 0,413    | 4,730          | 2,25E-06        | 2,63E-03 | Bacteria | Fibrobacterota   | Fibrobacteria           | Fibrobacterales            | Fibrobacteraceae           | possible_genus_04          |
| Otu00404 | 1,942  | 0,470    | 4,129          | 3,65E-05        | 2,06E-02 | Bacteria | Bacteria_unclas. | Bacteria_unclas.        | Bacteria_unclas.           | Bacteria_unclas.           | Bacteria_unclas.           |
| Otu00291 | 1,678  | 0,372    | 4,511          | 6,45E-06        | 5,28E-03 | Bacteria | Bdellovibrionota | Oligoflexia             | 0319-6G20                  | 0319-6G20_fa               | 0319-6G20_ge               |
| Otu00217 | 1,674  | 0,413    | 4,049          | 5,13E-05        | 2,34E-02 | Bacteria | Gemmatimonadota  | S0134_terrestrial_group | S0134_terrestrial_group_or | S0134_terrestrial_group_fa | S0134_terrestrial_group_ge |
| Otu00196 | 1,640  | 0,431    | 3,807          | 1,41E-04        | 4,62E-02 | Bacteria | Bacteroidota     | Bacteroidia             | Cytophagales               | Microscillaceae            | Ohtaekwangia               |
| Otu00342 | 1,564  | 0,390    | 4,012          | 6,02E-05        | 2,60E-02 | Bacteria | Bacteria_unclas. | Bacteria_unclas.        | Bacteria_unclas.           | Bacteria_unclas.           | Bacteria_unclas.           |
| Otu00252 | 1,513  | 0,370    | 4,091          | 4,30E-05        | 2,21E-02 | Bacteria | Gemmatimonadota  | Gemmatimonadetes        | Gemmatimonadales           | Gemmatimonadaceae          | Gemmatimonas               |
| Otu00253 | 1,482  | 0,373    | 3,968          | 7,25E-05        | 2,83E-02 | Bacteria | Bdellovibrionota | Bdellovibrionia         | Bacteriovoracales          | Bacteriovoracaceae         | Peredibacter               |
| Otu00017 | 1,166  | 0,224    | 5,202          | 1,97E-07        | 5,39E-04 | Bacteria | Gemmatimonadota  | Gemmatimonadetes        | Gemmatimonadales           | Gemmatimonadaceae          | uncultured                 |
| Otu00057 | 1,138  | 0,272    | 4,189          | 2,81E-05        | 1,77E-02 | Bacteria | Bacteroidota     | Bacteroidia             | Sphingobacteriales         | env,OPS_17                 | env,OPS_17_ge              |
| Otu00025 | 0,995  | 0,258    | 3,859          | 1,14E-04        | 4,00E-02 | Bacteria | Acidobacteriota  | Blastocatellia          | Blastocatellales           | Blastocatellaceae          | Blastocatellaceae_unclas.  |
| Otu00007 | 0,910  | 0,192    | 4,745          | 2,09E-06        | 2,63E-03 | Bacteria | Bacteroidota     | Bacteroidia             | Chitinophagales            | Chitinophagaceae           | Flavisolibacter            |
| Otu00105 | -1,312 | 0,326    | -4,020         | 5,82E-05        | 2,58E-02 | Bacteria | Proteobacteria   | Alphaproteobacteria     | Reyranellales              | Reyranellaceae             | Reyranella                 |
| Otu00010 | -1,714 | 0,376    | -4,557         | 5,19E-06        | 4,48E-03 | Bacteria | Actinobacteriota | Actinobacteria          | Micrococcales              | Micrococcaceae             | Pseudarthrobacter          |
| Otu00063 | -2,309 | 0,458    | -5,042         | 4,62E-07        | 8,41E-04 | Bacteria | Proteobacteria   | Gammaproteobacteria     | Xanthomonadales            | Rhodanobacteraceae         | Rhodanobacter              |
| Otu00460 | -2,339 | 0,573    | -4,084         | 4,42E-05        | 2,21E-02 | Bacteria | Proteobacteria   | Alphaproteobacteria     | Rhizobiales                | Xanthobacteraceae          | Rhodopseudomonas           |
| Otu00334 | -2,556 | 0,538    | -4,753         | 2,01E-06        | 2,63E-03 | Bacteria | Bacteroidota     | Bacteroidia             | Cytophagales               | Microscillaceae            | uncultured                 |
| Otu00723 | -2,766 | 0,692    | -3,997         | 6,42E-05        | 2,70E-02 | Bacteria | Firmicutes       | Bacilli                 | Bacilli_unclas.            | Bacilli_unclas.            | Bacilli_unclas.            |

|          |        |       |        |          |          |          |                   |                     |                    |                                |                            |
|----------|--------|-------|--------|----------|----------|----------|-------------------|---------------------|--------------------|--------------------------------|----------------------------|
| Otu01014 | -3,459 | 0,890 | -3,889 | 1,01E-04 | 3,75E-02 | Bacteria | Verrucomicrobiota | Verrucomicrobiae    | Pedosphaerales     | Pedosphaeraceae                | Pedosphaeraceae_unclas.    |
| Otu00977 | -3,555 | 0,811 | -4,382 | 1,17E-05 | 8,74E-03 | Bacteria | Proteobacteria    | Gammaproteobacteria | Burkholderiales    | Nitrosomonadaceae              | GOUTA6                     |
| Otu00472 | -3,570 | 0,917 | -3,895 | 9,83E-05 | 3,75E-02 | Bacteria | Acidobacteriota   | Acidobacteriae      | Acidobacteriales   | Acidobacteriaceae_(Subgroup_1) | Acidipila-Silvibacterium   |
| Otu00694 | -3,672 | 0,903 | -4,069 | 4,72E-05 | 2,21E-02 | Bacteria | Planctomycetota   | OM190               | OM190_or           | OM190_fa                       | OM190_ge                   |
| Otu00942 | -3,682 | 0,802 | -4,589 | 4,46E-06 | 4,33E-03 | Bacteria | Verrucomicrobiota | Verrucomicrobiae    | Pedosphaerales     | Pedosphaeraceae                | uncultured                 |
| Otu00271 | -3,780 | 0,774 | -4,886 | 1,03E-06 | 1,62E-03 | Bacteria | Gemmatimonadota   | Gemmatimonadetes    | Gemmatimonadales   | Gemmatimonadaceae              | uncultured                 |
| Otu00609 | -3,788 | 0,911 | -4,160 | 3,19E-05 | 1,94E-02 | Bacteria | Planctomycetota   | Pla4_lineage        | Pla4_lineage_or    | Pla4_lineage_fa                | Pla4_lineage_ge            |
| Otu00526 | -3,899 | 0,942 | -4,139 | 3,48E-05 | 2,04E-02 | Bacteria | Proteobacteria    | Gammaproteobacteria | Salinisphaerales   | Solimonadaceae                 | Polycyclovorans            |
| Otu01230 | -3,926 | 1,017 | -3,861 | 1,13E-04 | 4,00E-02 | Bacteria | Bacteroidota      | Bacteroidia         | Sphingobacteriales | Sphingobacteriaceae            | Sphingobacterium           |
| Otu00090 | -4,114 | 0,650 | -6,327 | 2,50E-10 | 2,05E-06 | Bacteria | Verrucomicrobiota | Verrucomicrobiae    | Pedosphaerales     | Pedosphaeraceae                | uncultured                 |
| Otu00222 | -4,352 | 0,797 | -5,460 | 4,77E-08 | 1,93E-04 | Bacteria | Proteobacteria    | Gammaproteobacteria | Xanthomonadales    | Xanthomonadaceae               | Pseudoxanthomonas          |
| Otu00476 | -5,098 | 1,169 | -4,359 | 1,30E-05 | 9,30E-03 | Bacteria | Gemmatimonadota   | Gemmatimonadetes    | Gemmatimonadales   | Gemmatimonadaceae              | uncultured                 |
| Otu00444 | -5,164 | 1,150 | -4,489 | 7,14E-06 | 5,57E-03 | Bacteria | Patescibacteria   | Saccharimonadia     | Saccharimonadales  | Saccharimonadaceae             | Saccharimonadaceae_unclas. |
| Otu00761 | -5,170 | 1,267 | -4,081 | 4,48E-05 | 2,21E-02 | Bacteria | Patescibacteria   | Saccharimonadia     | Saccharimonadales  | Saccharimonadales_fa           | Saccharimonadales_ge       |
| Otu00897 | -5,508 | 1,381 | -3,989 | 6,63E-05 | 2,72E-02 | Bacteria | Planctomycetota   | Pla4_lineage        | Pla4_lineage_or    | Pla4_lineage_fa                | Pla4_lineage_ge            |
| Otu01466 | -5,902 | 1,486 | -3,972 | 7,13E-05 | 2,83E-02 | Bacteria | Patescibacteria   | Saccharimonadia     | Saccharimonadales  | Saccharimonadales_unclas.      | Saccharimonadales_unclas.  |
| Otu00416 | -5,963 | 1,155 | -5,161 | 2,45E-07 | 5,74E-04 | Bacteria | Acidobacteriota   | Holophagae          | Holophagales       | Holophagaceae                  | Holophaga                  |
| Otu00569 | -6,209 | 1,145 | -5,422 | 5,90E-08 | 1,93E-04 | Bacteria | Verrucomicrobiota | Verrucomicrobiae    | Pedosphaerales     | Pedosphaeraceae                | uncultured                 |
| Otu00666 | -6,901 | 1,367 | -5,050 | 4,42E-07 | 8,41E-04 | Bacteria | FCPU426           | FCPU426_cl          | FCPU426_or         | FCPU426_fa                     | FCPU426_ge                 |
| Otu00442 | -7,119 | 1,866 | -3,816 | 1,36E-04 | 4,62E-02 | Bacteria | Bacteroidota      | Bacteroidia         | Sphingobacteriales | env,OPS_17                     | env,OPS_17_ge              |
