# Supplementary material for: Changes in the Microbial Composition of the Rhizosphere of Hop Plants Affected by Verticillium Wilt Caused by Verticillium nonalfalfae
Source: MDPI journal article supplement (doi:10.3390/microorganisms11071819), 2023-07-16
Supplement: s1 [file s1]

**Supplementary Material. Table S3.** Pairwise comparison of estimated marginal means for factors and interactions that significantly affected diversity indices in fungal communities (see Main text). *p*-values were adjusted with FDR method. The significance of each factor is indicated with asterisks: \*\*\*:  $p < 0.001$ ; \*:  $p < 0.05$ .

D: diseased condition; H: healthy condition; DB: diseased bulk soil; HB: healthy bulk soil; DR: diseased rhizosphere soil; HR: healthy rhizosphere soil. SE: Standard Error; df: degrees of freedom; Inf: infinite

|                          | Estimate    | SE         | df  | z-ratio   | <i>p</i> -value |
|--------------------------|-------------|------------|-----|-----------|-----------------|
| <b>Observed richness</b> |             |            |     |           |                 |
| <b>D – H</b>             | 0.094       | 0.0245     | Inf | 3844      | 0.0001***       |
| <b>Chao1 Index</b>       |             |            |     |           |                 |
| <b>D – H</b>             | 0.0906      | 0.0369     | 13  | 2456      | 0.0289*         |
| <b>Shannon index</b>     |             |            |     |           |                 |
| <b>D R - H R</b>         | 0.09904887  | 0.03601582 | 12  | 2.750149  | 0.04796495*     |
| <b>D B - H B</b>         | -0.03802168 | 0.03601582 | 12  | -1.055694 | 0.31189936      |
| <b>H B - H R</b>         | 0.09301458  | 0.03601582 | 12  | 2.582603  | 0.04796495*     |
| <b>D B - D R</b>         | -0.04405596 | 0.03601582 | 12  | -1.223239 | 0.31189936      |
| <b>Pielou index</b>      |             |            |     |           |                 |
| <b>D R - H R</b>         | 0.08835823  | 0.03395578 | 12  | 2.602156  | 0.04626758*     |
| <b>D B - H B</b>         | -0.05534042 | 0.03395578 | 12  | -1.629779 | 0.14705405      |
| <b>H B - H R</b>         | 0.09106042  | 0.03395578 | 12  | 2.681735  | 0.04626758*     |
| <b>D B - D R</b>         | -0.05263824 | 0.03395578 | 12  | -1.550200 | 0.14705405      |
