# Supplementary material for: Changes in the Microbial Composition of the Rhizosphere of Hop Plants Affected by Verticillium Wilt Caused by Verticillium nonalfalfae
Source: MDPI journal article supplement (doi:10.3390/microorganisms11071819), 2023-07-16
Supplement: s1 [file s1]

**Supplementary Material. Table S4.** Pairwise comparison of estimated marginal means for factors and interactions that significantly affected diversity indices in bacterial communities (see Main text). *p*-values were adjusted with FDR method. The significance of each factor is indicated with asterisks: \*:  $p < 0.05$ .

D: diseased condition; H: healthy condition; DB: diseased bulk soil; HB: healthy bulk soil; DR: diseased rhizosphere soil; HR: healthy rhizosphere soil. SE: Standart Error; df: degrees of freedom; Inf: infinite

|                          | Estimation | SE    | df  | z-ratio | <i>p</i> -value |
|--------------------------|------------|-------|-----|---------|-----------------|
| <b>Observed richness</b> |            |       |     |         |                 |
| <b>D R - H R</b>         | 0.266      | 0.102 | Inf | 2.592   | 0.026*          |
| <b>D B - H B</b>         | -0.120     | 0.102 | Inf | -1.173  | 0.241           |
| <b>H B - H R</b>         | 0.131      | 0.102 | Inf | 1.278   | 0.241           |
| <b>D B - D R</b>         | -0.255     | 0.102 | Inf | -2.487  | 0.026*          |
| <b>Chao1 index</b>       |            |       |     |         |                 |
| <b>D R - H R</b>         | 0.305      | 0.119 | 12  | 2.573   | 0.049*          |
| <b>D B - H B</b>         | -0.146     | 0.119 | 12  | -1.229  | 0.297           |
| <b>H B - H R</b>         | 0.129      | 0.119 | 12  | 1.091   | 0.297           |
| <b>D B - D R</b>         | -0.322     | 0.119 | 12  | -2.711  | 0.049           |
| <b>Shannon index</b>     |            |       |     |         |                 |
| <b>D R - H R</b>         | 0.017      | 0.016 | 13  | 1.061   | 0.495           |
| <b>D B - H B</b>         | 0.017      | 0.016 | 13  | 1.061   | 0.495           |
| <b>H B - H R</b>         | 0.012      | 0.016 | 13  | 0.703   | 0.495           |
| <b>D B - D R</b>         | 0.012      | 0.016 | 13  | 0.703   | 0.495           |
