# Supplementary material for: Changes in the Microbial Composition of the Rhizosphere of Hop Plants Affected by Verticillium Wilt Caused by Verticillium nonalfalfae
Source: MDPI journal article supplement (doi:10.3390/microorganisms11071819), 2023-07-16
Supplement: s1 [file s1]

**Supplementary Material. Table S6.-** Fungal OTUs with significant differential abundances between diseased bulk (DB) and diseased rhizosphere (DR) soils. OTUs with a positive LFC are highlighted on a yellow background while OTUs with a negative LFC are highlighted on a blue background. LFC: log2-fold changes; SE: standard error; *p*-values were adjusted with the False Discovery Rate (FDR) method; unclas.: unclassified

| OTU     | LFC     | LFC (SE) | Wald statistic | <i>p</i> -value | FDR     | Phylum          | Class                           | Order              | Family                                | Genus                                         | Species                                       |
|---------|---------|----------|----------------|-----------------|---------|-----------------|---------------------------------|--------------------|---------------------------------------|-----------------------------------------------|-----------------------------------------------|
| Otu0159 | 22,511  | 3,384    | 6,652          | 2.9e-11         | 2.7e-08 | Chytridiomycota | Chytridiomycetes                | Spizellomycetales  | Spizellomycetaceae                    | Powellomyces                                  | Powellomyces sp                               |
| Otu0224 | 21,919  | 3,385    | 6,476          | 9.4e-11         | 5.9e-08 | Ascomycota      | Ascomycota unclas.              | Ascomycota unclas. | Ascomycota unclas.                    | Ascomycota unclas.                            | Ascomycota unclas.                            |
| Otu0228 | 21,454  | 3,385    | 6,338          | 2.3e-10         | 8.7e-08 | Zygomycota      | Zygomycota class Incertae sedis | Mortierellales     | Mortierellaceae                       | Mortierella                                   | Mortierella sp                                |
| Otu0211 | 20,843  | 3,386    | 6,155          | 7.5e-10         | 2.3e-07 | Ascomycota      | Sordariomycetes                 | Sordariales        | Lasiosphaeriaceae                     | Lasiosphaeris                                 | Lasiosphaeris hispida                         |
| Otu0110 | -3,825  | 0,963    | -3,97          | 7.2e-05         | 1.2e-02 | Fungi unclas.   | Fungi unclas.                   | Fungi unclas.      | Fungi unclas.                         | Fungi unclas.                                 | Fungi unclas.                                 |
| Otu0099 | -3,976  | 0,926    | -4,293         | 1.8e-05         | 4.1e-03 | Basidiomycota   | Tremellomycetes                 | Tremellales        | Tremellales family Incertae sedis     | Cryptococcus                                  | Cryptococcus podzolicus                       |
| Otu0248 | -5,977  | 1,418    | -4,215         | 2.5e-05         | 5.2e-03 | Ascomycota      | Sordariomycetes                 | Sordariales        | Lasiosphaeriaceae                     | Cladorrhinum                                  | Cladorrhinum sp                               |
| Otu0287 | -6,268  | 1,503    | -4,171         | 3.0e-05         | 5.6e-03 | Basidiomycota   | Microbotryomycetes              | Sporidiobolales    | Sporidiobolales family Incertae sedis | Sporidiobolales family Incertae sedis unclas. | Sporidiobolales family Incertae sedis unclas. |
| Otu0335 | -6,508  | 1,802    | -3,611         | 3.0e-04         | 4.7e-02 | Fungi unclas.   | Fungi unclas.                   | Fungi unclas.      | Fungi unclas.                         | Fungi unclas.                                 | Fungi unclas.                                 |
| Otu0139 | -9,25   | 1,55     | -5,97          | 2.4e-09         | 6.3e-07 | Chytridiomycota | Chytridiomycetes                | Rhizophydiales     | Rhizophydiales family Incertae sedis  | Operculomyces                                 | Operculomyces laminatus                       |
| Otu0358 | -21,522 | 3,387    | -6,354         | 2.1e-10         | 8.7e-08 | Ascomycota      | Sordariomycetes                 | Xylariales         | Xylariaceae                           | Xylaria                                       | Xylaria unclas.                               |
| Otu0246 | -22,687 | 3,385    | -6,702         | 2.1e-11         | 2.7e-08 | Fungi unclas.   | Fungi unclas.                   | Fungi unclas.      | Fungi unclas.                         | Fungi unclas.                                 | Fungi unclas.                                 |
