# Supplementary material for: Changes in the Microbial Composition of the Rhizosphere of Hop Plants Affected by Verticillium Wilt Caused by Verticillium nonalfalfae
Source: MDPI journal article supplement (doi:10.3390/microorganisms11071819), 2023-07-16

**Supplementary Material. Figure S1.** Representative scheme of the Verticillium wilt (*V. nonalfalfae*) infected hop field sampled for metataxonomic analysis and some important data (Left); and picture of a plant showing symptoms of Verticillium wilt surrounded by healthy plants (Right)

Variety: Celeia  
Plant age: 10 years  
First record of *V. nonalfalfae*: 2020  
Distance between rows: 2.4m  
Distance between plants: 1.3m  
Location: Savinja valley, Slovenia  
GPS: Y 506165,424 X 123975,556  
Hop field name: Šentrupert 2-1  
Soil and plant sampling: 17.06.2022

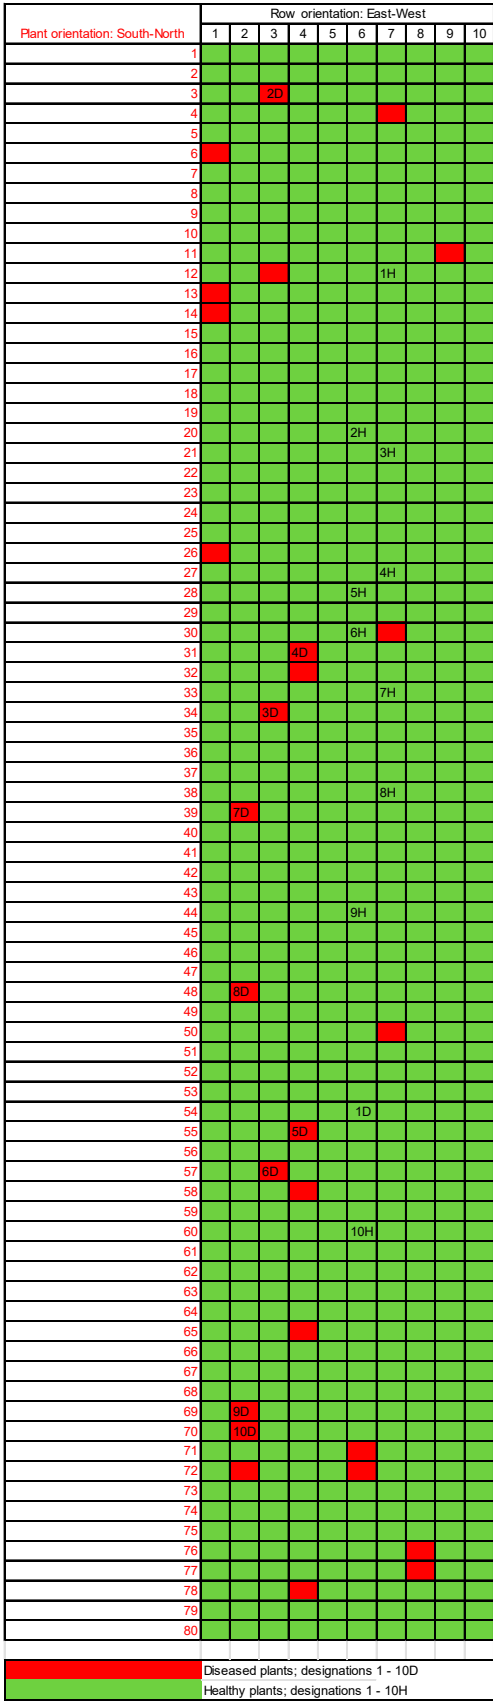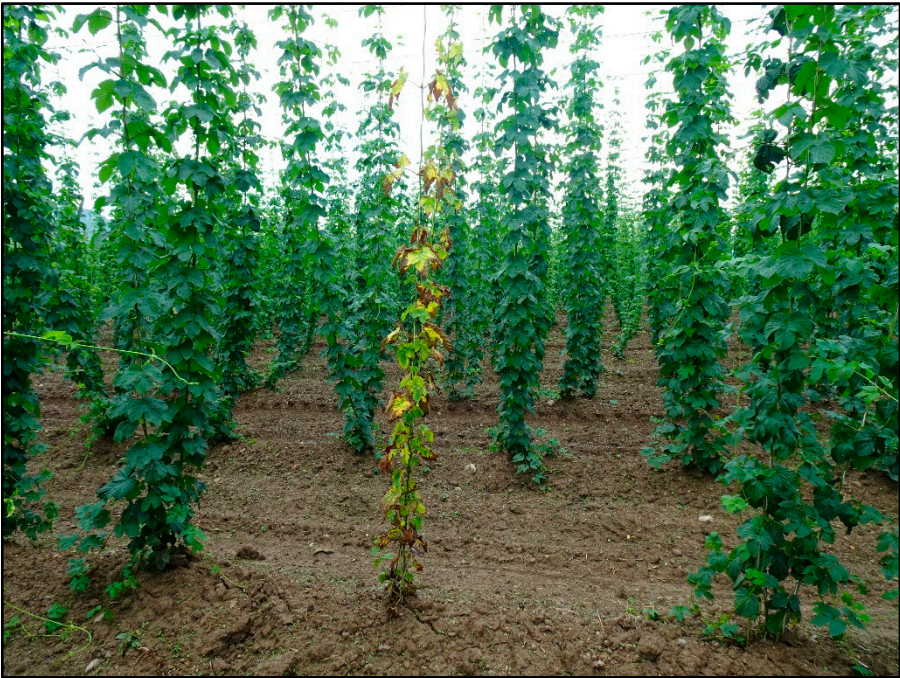

Supplement: s1 [file s1]
