# Supplementary material for: Changes in the Microbial Composition of the Rhizosphere of Hop Plants Affected by Verticillium Wilt Caused by Verticillium nonalfalfae
Source: MDPI journal article supplement (doi:10.3390/microorganisms11071819), 2023-07-16
Supplement: s1 [file s1]

**Supplementary Material. Table S7.-** Fungal OTUs with significant differential abundances between healthy bulk (HB) and diseased bulk (DB) soils. OTUs with a positive LFC are highlighted on a yellow background while OTUs with a negative LFC are highlighted on a blue background. LFC: log2-fold changes; SE: standard error; *p*-values were adjusted with the False Discovery Rate (FDR) method; unclas.: unclassified

| OTU     | LFC     | LFC (SE) | Wald statistic | <i>p</i> -value | FDR     | Phylum        | Class                           | Order                   | Family                                | Genus                                      | Species                                    |
|---------|---------|----------|----------------|-----------------|---------|---------------|---------------------------------|-------------------------|---------------------------------------|--------------------------------------------|--------------------------------------------|
| Otu0267 | 21,978  | 3,386    | 6,492          | 8.5e-11         | 1.7e-08 | Ascomycota    | Ascomycota unclas.              | Ascomycota unclas.      | Ascomycota unclas.                    | Ascomycota unclas.                         | Ascomycota unclas.                         |
| Otu0065 | 7,691   | 1,862    | 4,131          | 3.6e-05         | 2.7e-03 | Basidiomycota | Agaricomycetes                  | Agaricales              | Agaricales unclas.                    | Agaricales unclas.                         | Agaricales unclas.                         |
| Otu0300 | 6,63    | 1,977    | 3,354          | 8.0e-04         | 4.1e-02 | Ascomycota    | Dothideomycetes                 | Pleosporales            | Sporormiaceae                         | Preussia                                   | Preussia unclas.                           |
| Otu0087 | 4,595   | 1,125    | 4,086          | 4.4e-05         | 3.0e-03 | Fungi unclas. | Fungi unclas.                   | Fungi unclas.           | Fungi unclas.                         | Fungi unclas.                              | Fungi unclas.                              |
| Otu0037 | 3,632   | 0,967    | 3,757          | 1.7e-04         | 1.1e-02 | Fungi unclas. | Fungi unclas.                   | Fungi unclas.           | Fungi unclas.                         | Fungi unclas.                              | Fungi unclas.                              |
| Otu0013 | 2,108   | 0,608    | 3,466          | 5.3e-04         | 2.9e-02 | Ascomycota    | Dothideomycetes                 | Pleosporales            | Pleosporaceae                         | Alternaria                                 | Alternaria porri                           |
| Otu0003 | -1,763  | 0,43     | -4,1           | 4.1e-05         | 3.0e-03 | Ascomycota    | Dothideomycetes                 | Pleosporales            | Pleosporales family Incertae sedis    | Pleosporales family Incertae sedis unclas. | Pleosporales family Incertae sedis unclas. |
| Otu0033 | -2,248  | 0,647    | -3,477         | 5.1e-04         | 2.9e-02 | Ascomycota    | Dothideomycetes                 | Pleosporales            | Pleosporales unclas.                  | Pleosporales unclas.                       | Pleosporales unclas.                       |
| Otu0027 | -3,055  | 0,78     | -3,916         | 9.0e-05         | 5.9e-03 | Zygomycota    | Zygomycota class Incertae sedis | Mortierellales          | Mortierellaceae                       | Mortierella                                | Mortierella unclas.                        |
| Otu0141 | -3,095  | 0,916    | -3,38          | 7.2e-04         | 3.9e-02 | Ascomycota    | Leotiomycetes                   | Leotiomycetes unclas.   | Leotiomycetes unclas.                 | Leotiomycetes unclas.                      | Leotiomycetes unclas.                      |
| Otu0071 | -3,476  | 0,755    | -4,601         | 4.2e-06         | 3.7e-04 | Basidiomycota | Tremellomycetes                 | Holtermanniales         | Holtermanniales family Incertae sedis | Holtermannia                               | Holtermannia corniformis                   |
| Otu0102 | -3,771  | 0,865    | -4,359         | 1.3e-05         | 1.1e-03 | Ascomycota    | Dothideomycetes                 | Pleosporales            | Pleosporales unclas.                  | Pleosporales unclas.                       | Pleosporales unclas.                       |
| Otu0006 | -4,391  | 1,154    | -3,805         | 1.4e-04         | 9.0e-03 | Fungi unclas. | Fungi unclas.                   | Fungi unclas.           | Fungi unclas.                         | Fungi unclas.                              | Fungi unclas.                              |
| Otu0382 | -4,992  | 1,514    | -3,296         | 9.8e-04         | 5.0e-02 | Ascomycota    | Dothideomycetes                 | Dothideomycetes unclas. | Dothideomycetes unclas.               | Dothideomycetes unclas.                    | Dothideomycetes unclas.                    |
| Otu0179 | -5,844  | 1,235    | -4,734         | 2.2e-06         | 2.0e-04 | Ascomycota    | Sordariomycetes                 | Hypocreales             | Hypocreales family Incertae sedis     | Acremonium                                 | Acremonium nepalense                       |
| Otu0109 | -6,233  | 1,261    | -4,944         | 7.7e-07         | 7.4e-05 | Ascomycota    | Sordariomycetes                 | Sordariomycetes unclas. | Sordariomycetes unclas.               | Sordariomycetes unclas.                    | Sordariomycetes unclas.                    |
| Otu0050 | -6,3    | 0,897    | -7,021         | 2.2e-12         | 6.4e-10 | Ascomycota    | Sordariomycetes                 | Hypocreales             | Cordycipitaceae                       | Cordycipitaceae unclas.                    | Cordycipitaceae unclas.                    |
| Otu0234 | -6,852  | 1,842    | -3,72          | 2.0e-04         | 1.2e-02 | Fungi unclas. | Fungi unclas.                   | Fungi unclas.           | Fungi unclas.                         | Fungi unclas.                              | Fungi unclas.                              |
| Otu0265 | -6,922  | 1,926    | -3,595         | 3.2e-04         | 1.9e-02 | Basidiomycota | Agaricomycetes                  | Auriculariales          | Auriculariales unclas.                | Auriculariales unclas.                     | Auriculariales unclas.                     |
| Otu0403 | -6,994  | 1,643    | -4,258         | 2.1e-05         | 1.7e-03 | Fungi unclas. | Fungi unclas.                   | Fungi unclas.           | Fungi unclas.                         | Fungi unclas.                              | Fungi unclas.                              |
| Otu0352 | -7,528  | 1,822    | -4,131         | 3.6e-05         | 2.7e-03 | Basidiomycota | Tremellomycetes                 | Trichosporonales        | Trichosporonaceae                     | Trichosporon                               | Trichosporon unclas.                       |
| Otu0316 | -7,546  | 1,846    | -4,087         | 4.4e-05         | 3.0e-03 | Basidiomycota | Basidiomycota unclas.           | Basidiomycota unclas.   | Basidiomycota unclas.                 | Basidiomycota unclas.                      | Basidiomycota unclas.                      |
| Otu0097 | -9,234  | 1,622    | -5,695         | 1.2e-08         | 1.3e-06 | Fungi unclas. | Fungi unclas.                   | Fungi unclas.           | Fungi unclas.                         | Fungi unclas.                              | Fungi unclas.                              |
| Otu0088 | -9,243  | 1,196    | -7,728         | 1.1e-14         | 5.5e-12 | Ascomycota    | Ascomycota unclas.              | Ascomycota unclas.      | Ascomycota unclas.                    | Ascomycota unclas.                         | Ascomycota unclas.                         |
| Otu0080 | -10,453 | 1,283    | -8,146         | 3.8e-16         | 3.8e-13 | Ascomycota    | Ascomycota unclas.              | Ascomycota unclas.      | Ascomycota unclas.                    | Ascomycota unclas.                         | Ascomycota unclas.                         |
| Otu0423 | -20,145 | 2,517    | -8,004         | 1.2e-15         | 8.1e-13 | Ascomycota    | Ascomycota unclas.              | Ascomycota unclas.      | Ascomycota unclas.                    | Ascomycota unclas.                         | Ascomycota unclas.                         |

|         |         |       |        |         |         |                 |                                 |                        |                        |                            |                            |
|---------|---------|-------|--------|---------|---------|-----------------|---------------------------------|------------------------|------------------------|----------------------------|----------------------------|
| Otu0468 | -20,425 | 2,474 | -8,257 | 1.5e-16 | 3.0e-13 | Basidiomycota   | Agaricomycetes                  | Agaricomycetes unclas. | Agaricomycetes unclas. | Agaricomycetes unclas.     | Agaricomycetes unclas.     |
| Otu0531 | -20,505 | 3,387 | -6,053 | 1.4e-09 | 1.5e-07 | Chytridiomycota | Chytridiomycetes                | Rhizophlyctidales      | Rhizophlyctidaceae     | Rhizophlyctis              | Rhizophlyctis rosea        |
| Otu0493 | -20,677 | 3,387 | -6,105 | 1.0e-09 | 1.2e-07 | Basidiomycota   | Agaricomycetes                  | Agaricales             | Mycenaceae             | Mycena                     | Mycena unclas.             |
| Otu0453 | -21,017 | 3,387 | -6,102 | 1.1e-09 | 1.2e-07 | Basidiomycota   | Agaricomycetes                  | Agaricales             | Mycenaceae             | Mycena                     | Mycena unclas.             |
| Otu0308 | -21,096 | 3,386 | -6,23  | 4.7e-10 | 5.9e-08 | Ascomycota      | Ascomycota unclas.              | Ascomycota unclas.     | Ascomycota unclas.     | Ascomycota unclas.         | Ascomycota unclas.         |
| Otu0344 | -21,327 | 3,386 | -6,321 | 2.6e-10 | 3.5e-08 | Basidiomycota   | Agaricomycetes                  | Agaricales             | Mycenaceae             | Mycena                     | Mycena unclas.             |
| Otu0173 | -21,443 | 3,384 | -6,336 | 2.4e-10 | 3.4e-08 | Chytridiomycota | Chytridiomycetes                | Spizellomycetales      | Spizellomycetaceae     | Spizellomyces              | Spizellomyces unclas.      |
| Otu0311 | -21,453 | 3,385 | -6,337 | 2.3e-10 | 3.4e-08 | Ascomycota      | Orbiliomycetes                  | Orbiliales             | Orbiliaceae            | Orbiliaceae unclas.        | Orbiliaceae unclas.        |
| Otu0233 | -21,85  | 3,385 | -6,455 | 1.1e-10 | 1.8e-08 | Chytridiomycota | Chytridiomycetes                | Spizellomycetales      | Spizellomycetaceae     | Spizellomycetaceae unclas. | Spizellomycetaceae unclas. |
| Otu0291 | -21,871 | 3,385 | -6,461 | 1.0e-10 | 1.8e-08 | Glomeromycota   | Glomeromycetes                  | Glomerales             | Glomerales unclas.     | Glomerales unclas.         | Glomerales unclas.         |
| Otu0182 | -22,411 | 3,384 | -6,622 | 3.5e-11 | 8.0e-09 | Fungi unclas.   | Fungi unclas.                   | Fungi unclas.          | Fungi unclas.          | Fungi unclas.              | Fungi unclas.              |
| Otu0151 | -22,879 | 3,384 | -6,761 | 1.4e-11 | 3.5e-09 | Basidiomycota   | Basidiomycota unclas.           | Basidiomycota unclas.  | Basidiomycota unclas.  | Basidiomycota unclas.      | Basidiomycota unclas.      |
| Otu0128 | -23,447 | 3,384 | -7,028 | 2.1e-12 | 6.4e-10 | Zygomycota      | Zygomycota class Incertae sedis | Mortierellales         | Mortierellaceae        | Mortierella                | Mortierella ambigua        |
| Otu0056 | -24,053 | 3,383 | -7,598 | 3.0e-14 | 1.2e-11 | Basidiomycota   | Agaricomycetes                  | Cantharellales         | Ceratobasidiaceae      | Ceratobasidium             | Ceratobasidium sp          |
