# Supplementary material for: Changes in the Microbial Composition of the Rhizosphere of Hop Plants Affected by Verticillium Wilt Caused by Verticillium nonalfalfae
Source: MDPI journal article supplement (doi:10.3390/microorganisms11071819), 2023-07-16
Supplement: s1 [file s1]

**Supplementary Material. Table S12.-** Bacterial OTUs with significant differential abundances between healthy (HR) and diseased rizhosphere (DR) soils. OTUs with a positive LFC are highlighted on a yellow background while OTUs with a negative LFC are highlighted on a blue background. LFC: log2-fold changes; SE: standard error; *p*-values were adjusted with the False Discovery Rate (FDR) method; unclas.: unclassified

| OTU      | LFC    | LFC (SE) | Wald statistic | <i>p</i> -value | FDR      | Phylum   | Class             | Order               | Family             | Genus                | Species                 |
|----------|--------|----------|----------------|-----------------|----------|----------|-------------------|---------------------|--------------------|----------------------|-------------------------|
| Otu01133 | 6,613  | 1,365    | 4,843          | 1,28E-06        | 2,28E-03 | Bacteria | Bacteroidota      | Bacteroidia         | Chitinophagales    | Chitinophagaceae     | Chitinophaga            |
| Otu00715 | 3,561  | 0,876    | 4,065          | 4,80E-05        | 2,96E-02 | Bacteria | Cyanobacteria     | Cyanobacteriia      | Cyanobacteriales   | Nostocaceae          | Nostoc_PCC-73102        |
| Otu00508 | 3,121  | 0,783    | 3,987          | 6,68E-05        | 3,83E-02 | Bacteria | Acidobacteriota   | Holophagae          | Subgroup_7         | Subgroup_7_fa        | Subgroup_7_ge           |
| Otu00673 | 2,539  | 0,587    | 4,327          | 1,51E-05        | 1,40E-02 | Bacteria | Bacteria_unclas.  | Bacteria_unclas.    | Bacteria_unclas.   | Bacteria_unclas.     | Bacteria_unclas.        |
| Otu00352 | 2,356  | 0,482    | 4,894          | 9,88E-07        | 2,27E-03 | Bacteria | Planctomycetota   | Phycisphaerae       | Tepidisphaerales   | WD2101_soil_group    | WD2101_soil_group_ge    |
| Otu00246 | 1,959  | 0,376    | 5,211          | 1,88E-07        | 6,03E-04 | Bacteria | Acidobacteriota   | Holophagae          | Subgroup_7         | Subgroup_7_fa        | Subgroup_7_ge           |
| Otu00040 | 1,799  | 0,408    | 4,41           | 1,03E-05        | 1,15E-02 | Bacteria | Bacteria_unclas.  | Bacteria_unclas.    | Bacteria_unclas.   | Bacteria_unclas.     | Bacteria_unclas.        |
| Otu00097 | 1,458  | 0,338    | 4,307          | 1,66E-05        | 1,40E-02 | Bacteria | Chloroflexi       | Ktedonobacteria     | C0119              | C0119_fa             | C0119_ge                |
| Otu00017 | 1,324  | 0,233    | 5,696          | 1,23E-08        | 9,84E-05 | Bacteria | Gemmatimonadota   | Gemmatimonadetes    | Gemmatimonadales   | Gemmatimonadaceae    | uncultured              |
| Otu00014 | 1,292  | 0,312    | 4,142          | 3,44E-05        | 2,40E-02 | Bacteria | Proteobacteria    | Gammaproteobacteria | Burkholderiales    | Oxalobacteraceae     | Massilia                |
| Otu00195 | 1,234  | 0,299    | 4,123          | 3,74E-05        | 2,50E-02 | Bacteria | Chloroflexi       | Chloroflexia        | Chloroflexales     | Roseiflexaceae       | uncultured              |
| Otu00118 | 1,092  | 0,26     | 4,208          | 2,57E-05        | 1,87E-02 | Bacteria | Planctomycetota   | Phycisphaerae       | Tepidisphaerales   | WD2101_soil_group    | WD2101_soil_group_ge    |
| Otu00007 | 0,715  | 0,182    | 3,919          | 8,91E-05        | 4,61E-02 | Bacteria | Bacteroidota      | Bacteroidia         | Chitinophagales    | Chitinophagaceae     | Flavisolibacter         |
| Otu00263 | -1,885 | 0,462    | -4,077         | 4,56E-05        | 2,93E-02 | Bacteria | Proteobacteria    | Gammaproteobacteria | Burkholderiales    | Nitrosomonadaceae    | MND1                    |
| Otu00163 | -2,411 | 0,375    | -6,432         | 1,26E-10        | 2,02E-06 | Bacteria | Proteobacteria    | Gammaproteobacteria | Burkholderiales    | TRA3-20              | TRA3-20_ge              |
| Otu00117 | -2,419 | 0,55     | -4,399         | 1,09E-05        | 1,15E-02 | Bacteria | Verrucomicrobiota | Verrucomicrobiae    | Opitutales         | Opitutaceae          | Lacunisphaera           |
| Otu00164 | -2,531 | 0,564    | -4,492         | 7,07E-06        | 9,20E-03 | Bacteria | Bacteroidota      | Bacteroidia         | Cytophagales       | Microscillaceae      | Microscillaceae_unclas. |
| Otu00526 | -2,742 | 0,698    | -3,929         | 8,54E-05        | 4,57E-02 | Bacteria | Proteobacteria    | Gammaproteobacteria | Salinisphaerales   | Solimonadaceae       | Polycyclovorans         |
| Otu00271 | -2,78  | 0,528    | -5,27          | 1,36E-07        | 5,46E-04 | Bacteria | Gemmatimonadota   | Gemmatimonadetes    | Gemmatimonadales   | Gemmatimonadaceae    | uncultured              |
| Otu00090 | -2,841 | 0,569    | -4,995         | 5,90E-07        | 1,58E-03 | Bacteria | Verrucomicrobiota | Verrucomicrobiae    | Pedosphaerales     | Pedosphaeraceae      | uncultured              |
| Otu00826 | -2,933 | 0,728    | -4,027         | 5,64E-05        | 3,35E-02 | Bacteria | Myxococcota       | Polyangia           | Polyangiales       | Blrii41              | Blrii41_ge              |
| Otu00151 | -3,079 | 0,58     | -5,305         | 1,12E-07        | 5,46E-04 | Bacteria | Bacteroidota      | Bacteroidia         | Cytophagales       | Microscillaceae      | Hassallia               |
| Otu00942 | -3,097 | 0,68     | -4,557         | 5,18E-06        | 7,56E-03 | Bacteria | Verrucomicrobiota | Verrucomicrobiae    | Pedosphaerales     | Pedosphaeraceae      | uncultured              |
| Otu00609 | -3,248 | 0,76     | -4,271         | 1,94E-05        | 1,56E-02 | Bacteria | Planctomycetota   | Pla4_lineage        | Pla4_lineage_or    | Pla4_lineage_fa      | Pla4_lineage_ge         |
| Otu00512 | -3,313 | 0,755    | -4,387         | 1,15E-05        | 1,15E-02 | Bacteria | Planctomycetota   | OM190               | OM190_or           | OM190_fa             | OM190_ge                |
| Otu00666 | -3,731 | 0,945    | -3,949         | 7,85E-05        | 4,34E-02 | Bacteria | FCPU426           | FCPU426_cl          | FCPU426_or         | FCPU426_fa           | FCPU426_ge              |
| Otu00977 | -3,97  | 0,824    | -4,817         | 1,46E-06        | 2,34E-03 | Bacteria | Proteobacteria    | Gammaproteobacteria | Burkholderiales    | Nitrosomonadaceae    | GOUTA6                  |
| Otu00385 | -4,275 | 0,954    | -4,48          | 7,46E-06        | 9,20E-03 | Bacteria | Bacteroidota      | Bacteroidia         | Sphingobacteriales | NS11-12_marine_group | NS11-12_marine_group_ge |
| Otu00728 | -4,426 | 1,028    | -4,307         | 1,66E-05        | 1,40E-02 | Bacteria | Acidobacteriota   | Subgroup_22         | Subgroup_22_or     | Subgroup_22_fa       | Subgroup_22_ge          |
| Otu01230 | -5,248 | 1,238    | -4,238         | 2,25E-05        | 1,72E-02 | Bacteria | Bacteroidota      | Bacteroidia         | Sphingobacteriales | Sphingobacteriaceae  | Sphingobacterium        |
| Otu00476 | -5,513 | 1,136    | -4,852         | 1,22E-06        | 2,28E-03 | Bacteria | Gemmatimonadota   | Gemmatimonadetes    | Gemmatimonadales   | Gemmatimonadaceae    | uncultured              |
