# Supplementary material for: Changes in the Microbial Composition of the Rhizosphere of Hop Plants Affected by Verticillium Wilt Caused by Verticillium nonalfalfae
Source: MDPI journal article supplement (doi:10.3390/microorganisms11071819), 2023-07-16
Supplement: s1 [file s1]

**Supplementary Material. Table S8.-** Fungal OTUs with significant differential abundances between healthy (HR) and diseased rizhosphere (DR) soils. OTUs with a positive LFC are highlighted on a yellow background while OTUs with a negative LFC are highlighted on a blue background. LFC: log2-fold changes; SE: standard error; *p*-values were adjusted with the False Discovery Rate (FDR) method; unclas.: unclassified

| OTU     | LFC     | LFC (SE) | Wald statistic | <i>p</i> -value | FDR     | Phylum          | Class                           | Order                  | Family                            | Genus                  | Species                      |
|---------|---------|----------|----------------|-----------------|---------|-----------------|---------------------------------|------------------------|-----------------------------------|------------------------|------------------------------|
| Otu0092 | 24,311  | 3,384    | 7,185          | 6.7e-13         | 6.4e-10 | Basidiomycota   | Agaricomycetes                  | Auriculariales         | unclas. Auriculariales            | unclas. Auriculariales | Auriculariales sp            |
| Otu0163 | 23,237  | 3,384    | 6,867          | 6.6e-12         | 2.5e-09 | Basidiomycota   | Agaricomycetes                  | Agaricales             | Marasmiaceae                      | Calyprella             | Calyprella sp.               |
| Otu0116 | 22,987  | 3,384    | 6,793          | 1.1e-11         | 3.0e-09 | Basidiomycota   | Agaricomycetes                  | Cantharellales         | Ceratobasidiaceae                 | Thanatephorus          | Thanatephorus cucumeris      |
| Otu0283 | 21,788  | 3,385    | 6,436          | 1.2e-10         | 2.3e-08 | Basidiomycota   | Agaricomycetes                  | Agaricomycetes unclas. | Agaricomycetes unclas.            | Agaricomycetes unclas. | Agaricomycetes unclas.       |
| Otu0339 | 21,216  | 3,386    | 6,266          | 3.7e-10         | 5.0e-08 | Fungi unclas.   | Fungi unclas.                   | Fungi unclas.          | Fungi unclas.                     | Fungi unclas.          | Fungi unclas.                |
| Otu0460 | 20,34   | 3,388    | 6,003          | 1.9e-09         | 2.0e-07 | Ascomycota      | Eurotiomycetes                  |                        | Trichocomaceae                    | Paecilomyces           | Paecilomyces penicillatus    |
| Otu0161 | 8,42    | 1,578    | 5,336          | 9.5e-08         | 9.0e-06 | Glomeromycota   | Glomeromycetes                  | Glomerales             | Glomeraceae                       | Funneliformis          | Funneliformis mosseae        |
| Otu0211 | 7,961   | 1,625    | 4,897          | 9.7e-07         | 8.8e-05 | Ascomycota      | Sordariomycetes                 | Sordariales            | Lasiosphaeriaceae                 | Lasiosphaeria          | Lasiosphaeria hispida        |
| Otu0321 | 7,49    | 1,758    | 4,26           | 2.0e-05         | 1.6e-03 | Chytridiomycota | Chytridiomycetes                | Spizellomycetales      | Spizellomycetaceae                | Powellomyces           | Powellomyces sp              |
| Otu0330 | 5,68    | 1,675    | 3,391          | 7.0e-04         | 3.8e-02 | Chytridiomycota | Chytridiomycetes                | Spizellomycetales      | Spizellomycetaceae                | Spizellomyces          | Spizellomyces dolichospermus |
| Otu0075 | 4,637   | 1,031    | 4,497          | 6.9e-06         | 5.9e-04 | Ascomycota      | Ascomycota unclas.              | Ascomycota unclas.     | Ascomycota unclas.                | Ascomycota unclas.     | Ascomycota unclas.           |
| Otu0113 | 4,262   | 0,998    | 4,27           | 2.0e-05         | 1.5e-03 | Fungi unclas.   | Fungi unclas.                   | Fungi unclas.          | Fungi unclas.                     | Fungi unclas.          | Fungi unclas.                |
| Otu0096 | 3,257   | 0,726    | 4,488          | 7.2e-06         | 5.9e-04 | Fungi unclas.   | Fungi unclas.                   | Fungi unclas.          | Fungi unclas.                     | Fungi unclas.          | Fungi unclas.                |
| Otu0125 | 3,192   | 0,938    | 3,405          | 6.6e-04         | 3.7e-02 | Ascomycota      | Leotiomyces                     | Leotiomyces unclas.    | Leotiomyces unclas.               | Leotiomyces unclas.    | Leotiomyces unclas.          |
| Otu0037 | 3,006   | 0,821    | 3,66           | 2.5e-04         | 1.7e-02 | Fungi unclas.   | Fungi unclas.                   | Fungi unclas.          | Fungi unclas.                     | Fungi unclas.          | Fungi unclas.                |
| Otu0021 | -1,902  | 0,576    | -3,3           | 9.7e-04         | 5.0e-02 | Ascomycota      | Sordariomycetes                 | Sordariales            | Lasiosphaeriaceae                 | Zopfiella              | Zopfiella unclas.            |
| Otu0121 | -2,639  | 0,743    | -3,552         | 3.8e-04         | 2.3e-02 | Ascomycota      | Sordariomycetes                 | Sordariales            | Chaetomiaceae                     | Humicola               | Humicola grisea var. grisea  |
| Otu0205 | -4,718  | 1,202    | -3,926         | 8.6e-05         | 5.9e-03 | Basidiomycota   | Tremellomycetes                 | Trichosporonales       | Trichosporonaceae                 | Trichosporon           | Trichosporon laibachii       |
| Otu0215 | -5,186  | 1,426    | -3,637         | 2.8e-04         | 1.7e-02 | Zygomycota      | Zygomycota class Incertae sedis | Mortierellales         | Mortierellaceae                   | Mortierella            | Mortierella unclas.          |
| Otu0193 | -5,374  | 1,342    | -4,004         | 6.2e-05         | 4.4e-03 | Ascomycota      | Ascomycota unclas.              | Ascomycota unclas.     | Ascomycota unclas.                | Ascomycota unclas.     | Ascomycota unclas.           |
| Otu0099 | -5,54   | 0,962    | -5,759         | 8.4e-09         | 8.4e-07 | Basidiomycota   | Tremellomycetes                 | Tremellales            | Tremellales family Incertae sedis | Cryptococcus           | Cryptococcus podzolicus      |
| Otu0422 | -6,054  | 1,797    | -3,37          | 7.5e-04         | 4.0e-02 | Ascomycota      | Eurotiomycetes                  | Eurotiomycetes unclas. | Eurotiomycetes unclas.            | Eurotiomycetes unclas. | Eurotiomycetes unclas.       |
| Otu0218 | -6,081  | 1,721    | -3,532         | 4.1e-04         | 2.4e-02 | Ascomycota      | Ascomycota unclas.              | Ascomycota unclas.     | Ascomycota unclas.                | Ascomycota unclas.     | Ascomycota unclas.           |
| Otu0407 | -6,361  | 1,844    | -3,451         | 5.6e-04         | 3.2e-02 | Chytridiomycota | Chytridiomycetes                | Rhizophydiales         | Rhizophydiales unclas.            | Rhizophydiales unclas. | Rhizophydiales unclas.       |
| Otu0352 | -7,31   | 1,75     | -4,177         | 3.0e-05         | 2.2e-03 | Basidiomycota   | Tremellomycetes                 | Trichosporonales       | Trichosporonaceae                 | Trichosporon           | Trichosporon unclas.         |
| Otu0531 | -20,453 | 3,387    | -6,038         | 1.6e-09         | 1.7e-07 | Chytridiomycota | Chytridiomycetes                | Rhizophlyctidales      | Rhizophlyctidaceae                | Rhizophlyctis          | Rhizophlyctis rosea          |
| Otu0346 | -20,953 | 3,388    | -6,185         | 6.2e-10         | 7.4e-08 | Basidiomycota   | Agaricomycetes                  | Agaricales             | Tricholomataceae                  | Melanoleuca            | Melanoleuca communis         |
| Otu0468 | -21,026 | 3,388    | -6,207         | 5.4e-10         | 6.9e-08 | Basidiomycota   | Agaricomycetes                  | Agaricomycetes unclas. | Agaricomycetes unclas.            | Agaricomycetes unclas. | Agaricomycetes unclas.       |

|                |         |       |        |         |         |                 |                       |                       |                       |                       |                       |
|----------------|---------|-------|--------|---------|---------|-----------------|-----------------------|-----------------------|-----------------------|-----------------------|-----------------------|
| <b>Otu0453</b> | -21,263 | 3,387 | -6,278 | 3.4e-10 | 5.0e-08 | Basidiomycota   | Agaricomycetes        | Agaricales            | Mycenaceae            | Mycena                | Mycena unclas.        |
| <b>Otu0493</b> | -21,28  | 3,387 | -6,283 | 3.3e-10 | 5.0e-08 | Basidiomycota   | Agaricomycetes        | Agaricales            | Mycenaceae            | Mycena                | Mycena unclas.        |
| <b>Otu0308</b> | -21,623 | 3,386 | -6,386 | 1.7e-10 | 2.9e-08 | Ascomycota      | Ascomycota unclas.    |
| <b>Otu0344</b> | -21,963 | 3,385 | -6,487 | 8.7e-11 | 1.8e-08 | Basidiomycota   | Agaricomycetes        | Agaricales            | Mycenaceae            | Mycena                | Mycena unclas.        |
| <b>Otu0291</b> | -22,425 | 3,385 | -6,625 | 3.5e-11 | 8.2e-09 | Glomeromycota   | Glomeromycetes        | Glomerales            | Glomerales unclas.    | Glomerales unclas.    | Glomerales unclas.    |
| <b>Otu0173</b> | -23,077 | 3,384 | -6,819 | 9.2e-12 | 2.9e-09 | Chytridiomycota | Chytridiomycetes      | Spizellomycetales     | Spizellomycetaceae    | Spizellomyces         | Spizellomyces unclas. |
| <b>Otu0151</b> | -23,336 | 3,384 | -6,896 | 5.4e-12 | 2.5e-09 | Basidiomycota   | Basidiomycota unclas. |
| <b>Otu0149</b> | -23,447 | 3,384 | -6,929 | 4.3e-12 | 2.5e-09 | Ascomycota      | Ascomycota unclas.    |
| <b>Otu0056</b> | -26,179 | 3,383 | -7,737 | 1.0e-14 | 1.9e-11 | Basidiomycota   | Agaricomycetes        | Cantharellales        | Ceratobasidiaceae     | Ceratobasidium        | Ceratobasidium sp     |
