# Supplementary material for: Changes in the Microbial Composition of the Rhizosphere of Hop Plants Affected by Verticillium Wilt Caused by Verticillium nonalfalfae
Source: MDPI journal article supplement (doi:10.3390/microorganisms11071819), 2023-07-16
Supplement: s1 [file s1]

**Supplementary Material. Table S9.-** Bacterial OTUs with significant differential abundances between healthy bulk (HB) and healthy rhizosphere (HR) soils. OTUs with a positive LFC are highlighted on a yellow background while OTUs with a negative LFC are highlighted on a blue background. LFC: log2-fold changes; SE: standard error; *p*-values were adjusted with the False Discovery Rate (FDR) method; unclas.: unclassified

| OTU      | LFC    | LFC (SE) | Wald statistic | <i>p</i> -value | FDR      | Phylum   | Kingdom           | Class               | Order              | Family               | Genus                      |
|----------|--------|----------|----------------|-----------------|----------|----------|-------------------|---------------------|--------------------|----------------------|----------------------------|
| Otu00536 | 2,524  | 0,473    | 5,332          | 9,72E-08        | 3,65E-04 | Bacteria | Bacteria_unclas.  | Bacteria_unclas.    | Bacteria_unclas.   | Bacteria_unclas.     | Bacteria_unclas.           |
| Otu00534 | 2,377  | 0,464    | 5,125          | 2,97E-07        | 8,93E-04 | Bacteria | Verrucomicrobiota | Verrucomicrobiae    | Opitutales         | Opitutaceae          | Opitutaceae_unclas.        |
| Otu00283 | 1,262  | 0,298    | 4,235          | 2,28E-05        | 3,82E-02 | Bacteria | Myxococcota       | Polyangia           | Polyangiales       | Polyangiaceae        | Polyangiaceae_unclas.      |
| Otu00166 | -1,709 | 0,376    | -4,542         | 5,57E-06        | 1,40E-02 | Bacteria | Proteobacteria    | Gammaproteobacteria | Burkholderiales    | Alcaligenaceae       | Alcaligenaceae_ge          |
| Otu00010 | -1,900 | 0,290    | -6,543         | 6,05E-11        | 4,55E-07 | Bacteria | Actinobacteriota  | Actinobacteria      | Micrococcales      | Micrococcaceae       | Pseudarthrobacter          |
| Otu00312 | -2,515 | 0,576    | -4,367         | 1,26E-05        | 2,36E-02 | Bacteria | Patescibacteria   | Saccharimonadia     | Saccharimonadales  | Saccharimonadales_fa | Saccharimonadales_ge       |
| Otu00669 | -3,000 | 0,679    | -4,416         | 1,00E-05        | 2,16E-02 | Bacteria | Actinobacteriota  | Actinobacteria      | Glycomycetales     | Glycomycetaceae      | Glycomyces                 |
| Otu00552 | -3,273 | 0,520    | -6,300         | 2,98E-10        | 1,49E-06 | Bacteria | Verrucomicrobiota | Verrucomicrobiae    | Verrucomicrobiales | Rubritaleaceae       | Luteolibacter              |
| Otu00444 | -5,112 | 0,747    | -6,840         | 7,92E-12        | 1,19E-07 | Bacteria | Patescibacteria   | Saccharimonadia     | Saccharimonadales  | Saccharimonadaceae   | Saccharimonadaceae_unclas. |
