# Supplementary material for: Changes in the Microbial Composition of the Rhizosphere of Hop Plants Affected by Verticillium Wilt Caused by Verticillium nonalfalfae
Source: MDPI journal article supplement (doi:10.3390/microorganisms11071819), 2023-07-16
Supplement: s1 [file s1]

**Supplementary Material. Table S5.-** Fungal OTUs with significant differential abundances between healthy bulk (HB) and healthy rhizosphere (HR) soils. OTUs with a positive LFC are highlighted on a yellow background while OTUs with a negative LFC are highlighted on a blue background. LFC: log2-fold changes; SE: standard error; *p*-values were adjusted with the False Discovery Rate (FDR) method; unclas.: unclassified

| OTU     | LFC     | LFC (SE) | Wald statistic | <i>p</i> -value | FDR     | Phylum          | Class                           | Order                   | Family                  | Genus                      | Species                    |
|---------|---------|----------|----------------|-----------------|---------|-----------------|---------------------------------|-------------------------|-------------------------|----------------------------|----------------------------|
| Otu0032 | 7,381   | 1,952    | 3,782          | 1.6e-04         | 1.8e-02 | Basidiomycota   | Agaricomycetes                  | Agaricales              | Entolomataceae          | Entoloma                   | Entoloma unclas.           |
| Otu0106 | 6,335   | 1,841    | 3,44           | 5.8e-04         | 4.7e-02 | Chytridiomycota | Chytridiomycetes                | Spizellomycetales       | Spizellomycetaceae      | Spizellomycetaceae unclas. | Spizellomycetaceae unclas. |
| Otu0081 | 2,302   | 0,637    | 3,614          | 3.0e-04         | 2.7e-02 | Fungi unclas.   | Fungi unclas.                   | Fungi unclas.           | Fungi unclas.           | Fungi unclas.              | Fungi unclas.              |
| Otu0034 | 1,898   | 0,478    | 3,968          | 7.2e-05         | 9.5e-03 | Ascomycota      | Sordariomycetes                 | Sordariomycetes unclas. | Sordariomycetes unclas. | Sordariomycetes unclas.    | Sordariomycetes unclas.    |
| Otu0051 | -3,028  | 0,826    | -3,668         | 2.4e-04         | 2.3e-02 | Ascomycota      | Dothideomycetes                 | Pleosporales            | Didymosphaeriaceae      | Roussoella                 | Roussoella japonensis      |
| Otu0088 | -4,146  | 1,101    | -3,767         | 1.7e-04         | 1.8e-02 | Ascomycota      | Ascomycota unclas.              | Ascomycota unclas.      | Ascomycota unclas.      | Ascomycota unclas.         | Ascomycota unclas.         |
| Otu0165 | -4,985  | 1,246    | -4             | 6.3e-05         | 9.0e-03 | Chytridiomycota | Chytridiomycetes                | Rhizophlyctidales       | Rhizophlyctidaceae      | Rhizophlyctis              | Rhizophlyctis rosea        |
| Otu0234 | -5,149  | 1,283    | -4,012         | 6.0e-05         | 9.0e-03 | Fungi unclas.   | Fungi unclas.                   | Fungi unclas.           | Fungi unclas.           | Fungi unclas.              | Fungi unclas.              |
| Otu0006 | -5,153  | 1,495    | -3,446         | 5.7e-04         | 4.7e-02 | Fungi unclas.   | Fungi unclas.                   | Fungi unclas.           | Fungi unclas.           | Fungi unclas.              | Fungi unclas.              |
| Otu0262 | -5,418  | 1,2      | -4,516         | 6.3e-06         | 1.1e-03 | Fungi unclas.   | Fungi unclas.                   | Fungi unclas.           | Fungi unclas.           | Fungi unclas.              | Fungi unclas.              |
| Otu0410 | -6,175  | 1,571    | -3,931         | 8.5e-05         | 1.0e-02 | Ascomycota      | Sordariomycetes                 | Diaporthales            | Togniniaceae            | Phaeoacremonium            | Phaeoacremonium tuscanum   |
| Otu0394 | -6,684  | 1,797    | -3,719         | 2.0e-04         | 2.0e-02 | Basidiomycota   | Agaricomycetes                  | Russulales              | Stephanosporaceae       | unclas. Stephanosporaceae  | Stephanosporaceae sp       |
| Otu0050 | -7,098  | 0,729    | -9,733         | 2.2e-22         | 3.7e-19 | Ascomycota      | Sordariomycetes                 | Hypocreales             | Cordycipitaceae         | Cordycipitaceae unclas.    | Cordycipitaceae unclas.    |
| Otu0080 | -9,947  | 1,152    | -8,634         | 5.9e-18         | 5.1e-15 | Ascomycota      | Ascomycota unclas.              | Ascomycota unclas.      | Ascomycota unclas.      | Ascomycota unclas.         | Ascomycota unclas.         |
| Otu0460 | -19,96  | 3,388    | -5,891         | 3.8e-09         | 7.3e-07 | Ascomycota      | Eurotiomycetes                  | Eurotiales              | Trichocomaceae          | Paecilomyces               | Paecilomyces penicillatus  |
| Otu0398 | -21,017 | 3,387    | -6,206         | 5.4e-10         | 1.2e-07 | Zygomycota      | Zygomycota class Incertae sedis | Mortierellales          | Mortierellaceae         | Mortierella                | Mortierella unclas.        |
| Otu0339 | -21,327 | 3,386    | -6,299         | 3.0e-10         | 7.3e-08 | Fungi unclas.   | Fungi unclas.                   | Fungi unclas.           | Fungi unclas.           | Fungi unclas.              | Fungi unclas.              |
| Otu0283 | -21,828 | 3,385    | -6,448         | 1.1e-10         | 3.2e-08 | Basidiomycota   | Agaricomycetes                  | Agaricomycetes unclas.  | Agaricomycetes unclas.  | Agaricomycetes unclas.     | Agaricomycetes unclas.     |
| Otu0163 | -23,557 | 3,384    | -6,961         | 3.4e-12         | 1.2e-09 | Basidiomycota   | Agaricomycetes                  | Agaricales              | Marasmiaceae            | Calyptrata                 | Calyptrata sp.             |
| Otu0116 | -23,973 | 3,384    | -7,085         | 1.4e-12         | 6.0e-10 | Basidiomycota   | Agaricomycetes                  | Cantharellales          | Ceratobasidiaceae       | Thanatephorus              | Thanatephorus cucumeris    |
| Otu0111 | -24,053 | 3,384    | -7,108         | 1.2e-12         | 6.0e-10 | Fungi unclas.   | Fungi unclas.                   | Fungi unclas.           | Fungi unclas.           | Fungi unclas.              | Fungi unclas.              |
