# Supplementary material for: Changes in the Microbial Composition of the Rhizosphere of Hop Plants Affected by Verticillium Wilt Caused by Verticillium nonalfalfae
Source: MDPI journal article supplement (doi:10.3390/microorganisms11071819), 2023-07-16
Supplement: s1 [file s1]

**Supplementary Material. Table S11.-** Bacterial OTUs with significant differential abundances between healthy bulk (HB) and diseased bulk (DB) soils. OTUs with a positive LFC are highlighted on a yellow background while OTUs with a negative LFC are highlighted on a blue background. LFC: log2-fold changes; SE: standard error; *p*-values were adjusted with the False Discovery Rate (FDR) method; unclas.: unclassified

|          | LFC    | LFC (SE) | Wald statistic | <i>p</i> -value | FDR   | Phylum   | Kingdom          | Class            | Order             | Family                    | Genus                     |
|----------|--------|----------|----------------|-----------------|-------|----------|------------------|------------------|-------------------|---------------------------|---------------------------|
| Otu01429 | 5,306  | 1,179    | 4,501          | 6,77E-06        | 0,027 | Bacteria | Bacteria_unclas. | Bacteria_unclas. | Bacteria_unclas.  | Bacteria_unclas.          | Bacteria_unclas.          |
| Otu00893 | 3,841  | 0,786    | 4,885          | 1,04E-06        | 0,008 | Bacteria | Patescibacteria  | Saccharimonadia  | Saccharimonadales | Saccharimonadales_unclas. | Saccharimonadales_unclas. |
| Otu00097 | 1,305  | 0,242    | 5,400          | 6,67E-08        | 0,001 | Bacteria | Chloroflexi      | Ktedonobacteria  | C0119             | C0119_fa                  | C0119_ge                  |
| Otu01273 | -5,891 | 1,310    | -4,496         | 6,93E-06        | 0,027 | Bacteria | Chloroflexi      | Anaerolineae     | Anaerolineales    | Anaerolineaceae           | uncultured                |
